# Supplementary material
Source: Springer Nature journal article supplement (https://www.springermedizin.de/resource/supplementary/12998_2010_9_MOESM7_ESM.pdf/9680028)

Figure 4: The Heinrich Ratio

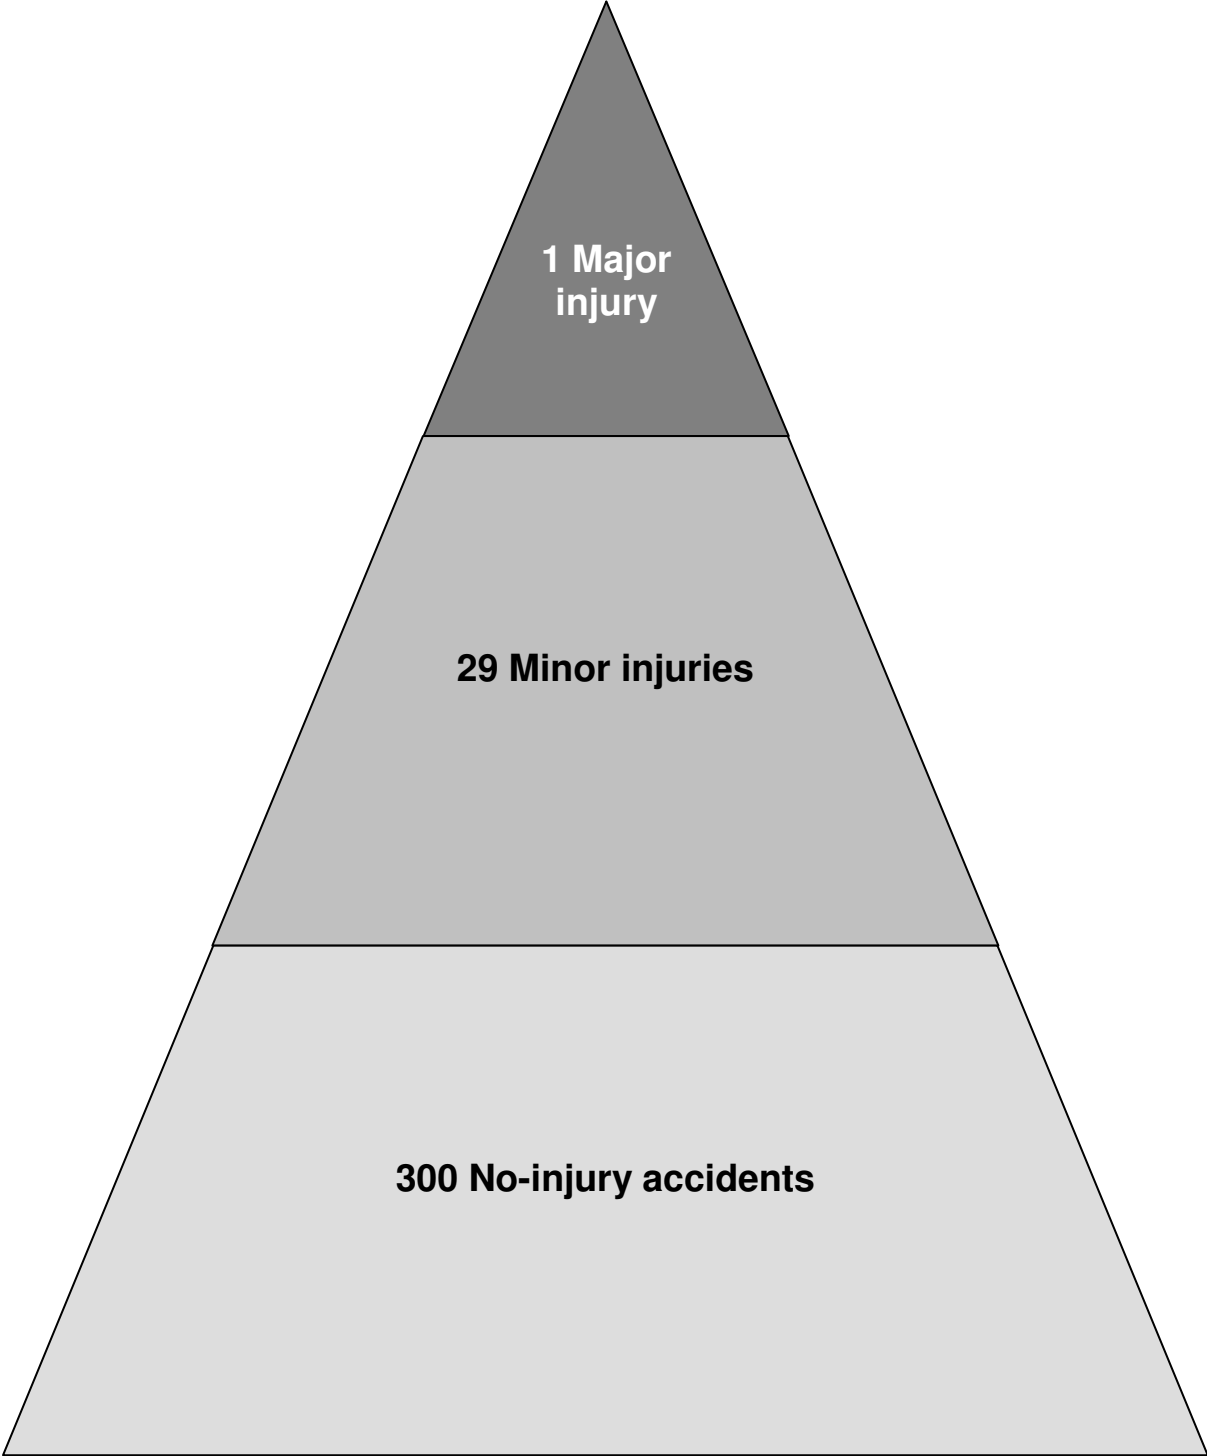

Supplement: MOESM7 [file 9680028]
